# Supplementary material
Source: publisher figshare collection journal article supplement (https://sage.figshare.com/ndownloader/files/18918857)
Supplement: Supplementary file 1 [file 18918857]

## **SURVEY**

ACUTE VASOREACTIVITY TESTING in PEDIATRIC IDIOPATHIC OR FAMILIAL PAH

### **Q1. WHAT DO YOU USE FOR THE AVT?**

1. Inhaled Nitric Oxide
2. Nitric Oxide+Oxygen (specify FiO<sub>2</sub> and PPm of NO)
3. 100% Oxygen
4. iv Epoprostenol
5. Inhaled Iloprost
6. Others (specify)

### **Q2. THE PATIENT CONDITION DURING THE CATHETERIZATION IS...**

1. General Anesthesia & Mechanical Ventilation
2. Sedation in spontaneous breathing
3. Awake patient
4. The condition is not always detailed in the cath report

### **Q3.WHICH CRITERIA DO YOU USE TO CONSIDER A +POSITIVE AVT**

1. Sitbon criteria
2. Barst criteria
3. almost normalization of PAP and PVR < 4.5 WU.m<sup>2</sup>
4. Others (specify)

### **Q4. FOR PATIENTS WHITH +AVRT in FC I-II YOUR FIRST LINE THERAPHY IS:**

1. Calcium channel blockers monotherapy
2. Calcium channel blockers+ oral drug (ERA/5PDEi)
3. other (specify)

### **Q5. FOR PATIENTS WHITH +AVRT in FC III YOUR FIRST LINE THERAPHY IS:**

1. Calcium channel blockers monotherapy
2. Calcium channel blockers+ oral drug (ERA/5PDEi)
3. Calcium channel blockers+ Prostacyclin

4. Calcium channel blockers+ Prostacyclin + oral drug (ERA/5PDEi)
5. ERA/ 5PDEi
6. Combination Therapy not including CCB

**Q6. FOR A PATIENT WITH + POSITIVE AVT , TREATED WITH CALCIUM CHANNEL MONOTHERAPY , YOU REPEAT THE CATH AFTER:**

1. 6 months of therapy
2. 12 months
3. 3 months
4. If the patient is doing well, and the echo shows improvement, I don't repeat the cath

**Q7. WHAT DO YOU CONSIDER "A MAINTAINED GOOD RESPONSE" IN THE LONG TERM AFTER CALCIUM CHANNEL BLOCKER THERAPY:**

1. Patient remains on FC I-II , and event –free, in spite of high pressure and resistances in the catheterization.
2. Remains on FC I/II and there is evidence of almost normalization of PA and PVR
3. Other. Specify)

**Q8. IF AFTER 6 MONTHS OF CALCIUM CHANNEL BLOCKER MONOTHERAPY the PVR/mPAP HAVENT CHANGED FROM BASAL , YOU:**

1. Remove the Calcium Channel and Start an ERA/PDEi
2. Add Another Therapy to the Calcium Channel Blocker
3. Depending on The PVR at the Second Catheterization

**Q9. HOW MANY OF THE PEDIATRIC PATIENTS WITH IDIOPATHIC PAH SEEN IN YOUR INSTITUTION (OR IN YOUR EXPERIENCE IN DIFFERENT INSTITUTIONS) HAVE HAD A +AVRT AND MAINTAINED NORMALIZATION OF PAP IN THE LONG TERM (MORE THAN 5-10 YEARS) WITH CCB? Example : 2 of 10 (20%)**

**Q10. DO YOU PERFORM ALSO AVRT IN OTHER TYPES OF PH? (e.: postoperative, associated to lung disease, etc...)**

1. yes, always, in every PH patient that is catheterized
2. Only in PAH patients
3. Only in Idiopathic or familial PAH.

**Q11. DO YOU ALSO PERFORM AVRT IN THE NEXT CATHETERIZATIONS OF YOUR PATIENTS DURING FOLLOW UP?**

1. Yes, always
2. Never

3. Depending on the case.

**Name:**

**Institution:**
